# Supplementary material for: Characterization of the human skin resistome and identification of two microbiota cutotypes
Source: PubMed Central journal article supplement (PMC7890624; doi:10.1186/s40168-020-00995-7), 2021-02-17

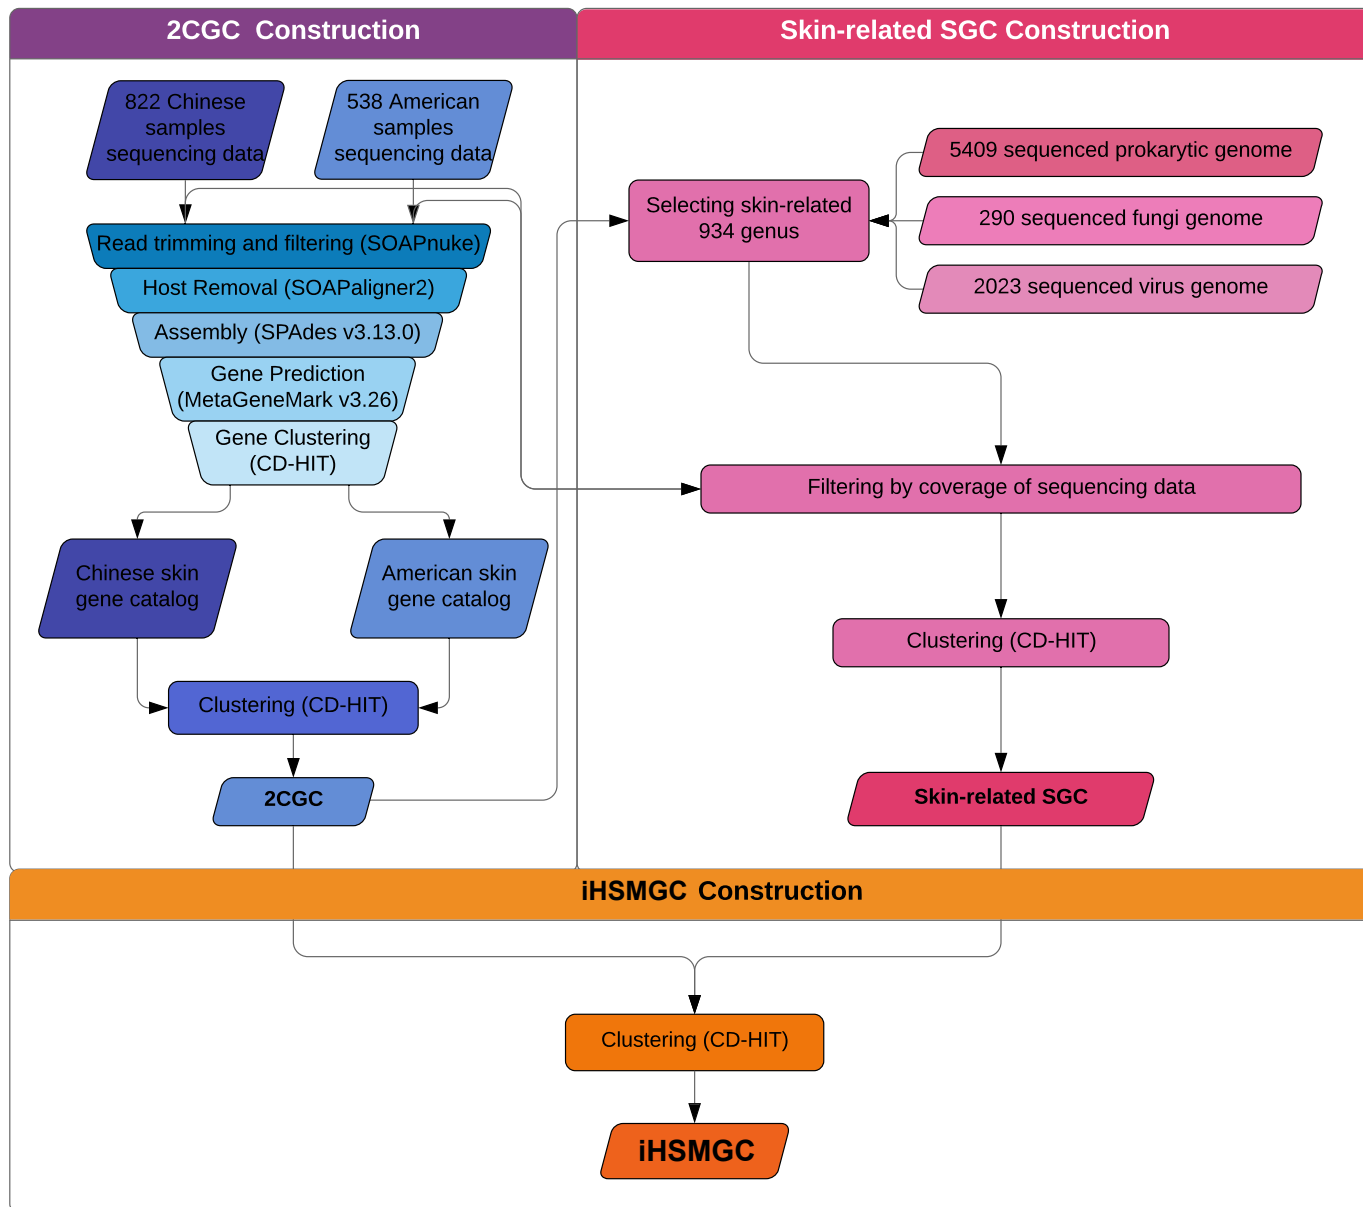

Supplement: 40168_2020_995_MOESM3_ESM.pdf [file 40168_2020_995_MOESM3_ESM.pdf]
