# Supplementary material for: Characterization of the human skin resistome and identification of two microbiota cutotypes
Source: PubMed Central journal article supplement (PMC7890624; doi:10.1186/s40168-020-00995-7), 2021-02-17
Supplement: 40168_2020_995_MOESM13_ESM.pdf [file 40168_2020_995_MOESM13_ESM.pdf]

**a**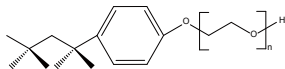

octylphenol polyethoxylates (OPEs)

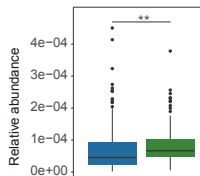K01637:*aceA*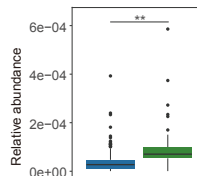K01638:*aceB*

■ *C-cutotype*  
■ *M-cutotype*

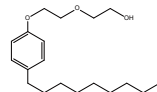

Alkylphenol ethoxylates

**b**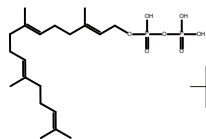

Geranylgeranyl diphosphate

K02291  
K17841

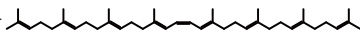

Phytoene

K02293

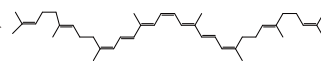

9,15,9'-tricis-zeta-Carotene

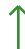

K09835

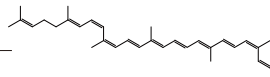

7,9,7',9'-tetrakis-Lycopene

K00514

K17841  
K06443  
K14605  
K14606

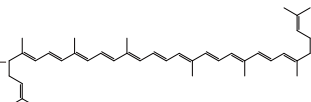

Lycopene

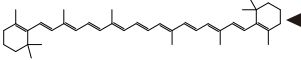

beta-Carotene
